# Supplementary material
Source: PubMed Central journal article supplement (PMC4023292)
Supplement: supp_cwp087_cwp087_suppl_data.pdf [file supp_cwp087_cwp087_suppl_data.pdf]

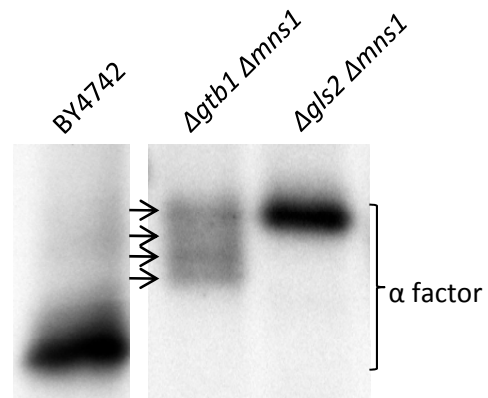

## Supplementary Figure 1

Cells were pulse-labelled for 5mins with  $^{35}\text{S}$  methionine/cysteine and then chased for 15 mins in the presence of  $\text{NaN}_3$  as before. Whole cell extracts were prepared and then pro- $\alpha$ -factor immunoprecipitated and resolved by 12.5% SDS-PAGE. The  $\Delta\text{gtb1}\Delta\text{mns1}$  (BWY635) was found to contain four bands (indicated with black arrows), the largest of which was found to co-migrate with the G2M9 form present in  $\Delta\text{gls2}\Delta\text{mns1}$  (BWY636). Since  $\Delta\text{mns1}$  cells lack mannosidase I activity then we can conclude that the four bands observed in  $\Delta\text{gtb1}\Delta\text{mns1}$  must all be in the Man9 form and so must correspond to glucose trimming intermediates.
